# Supplementary material for: Thermal and oxidation stability of functional oleogels formed by edible wax/starch and Schisandra chinensis oil
Source: Royal Society of Chemistry journal article supplement (doi:10.1039/c9fo01727e), 2019-01-01
Supplement: c9fo01727e1.pdf [file c9fo01727e1.pdf]

## Supplementary materials

**Table 1** The specific information of mixed fatty acid standards.

| Fatty acids  | Percentage (%) | Fatty acids | Percentage (%) | Fatty acids  | Percentage (%) | Fatty acids  | Percentage (%) |
|--------------|----------------|-------------|----------------|--------------|----------------|--------------|----------------|
| C 4:0        | 2              | C 6:0       | 2              | C 8:0        | 2              | C 10:0       | 4              |
| C 11:0       | 2              | C 12:0      | 4              | C 13:0       | 2              | C 14:1 n-5   | 2              |
| C 14:0       | 2              | C 15:1 n-5  | 2              | C 15:0       | 2              | C 16:1 n-7   | 2              |
| C 16:0       | 4              | C 17:1 n-8  | 2              | C 17:0       | 4              | C 18:0       | 4              |
| C 18:1 t n-9 | 2              | C 18:1 n-9  | 2              | C 18:2 t n-6 | 2              | C 18:2 n-6   | 2              |
| C 20:0       | 4              | C 18:3 n-3  | 4              | C 20:1 n-9   | 2              | C 18:3 n-6   | 2              |
| C 21:0       | 2              | C 20:2 n-9  | 2              | C 22:0       | 4              | C 20:3 t n-6 | 2              |
| C 22:1 n-9   | 2              | C 20:3 n-6  | 2              | C 20:4 n-6   | 2              | C 23:0       | 2              |
| C 22:2 n-9   | 2              | C 24:0      | 4              | C 20:5 n-3   | 2              | C 24:1 n-9   | 2              |
| C 22:6 n-3   | 2              | C 22:5 n-3  | 2              | C 22:4 n-6   | 2              | C 22:5 n-6   | 2              |

**Table 2** Linear range, regression equations and correlation coefficients of multi-component in fatty acid mixed standard solution.

| Peak | Component name        | CN/DB <sup>(1)</sup> | Abbr. | RT (min) | Formula                                        | Neutral mass (Da) | Regression equation (y=ax+b) | R <sup>2</sup> | Linear range (ng/mL) | LOQ (ng/mL) | LOD (ng/mL) |
|------|-----------------------|----------------------|-------|----------|------------------------------------------------|-------------------|------------------------------|----------------|----------------------|-------------|-------------|
| 1    | Decanoic acid         | C 10:0               | Cap   | 4.30     | C <sub>10</sub> H <sub>20</sub> O <sub>2</sub> | 172.1463          | y = 16077x - 269.23          | 0.9946         | 62.5-2000            | 62.5        | 20          |
| 2    | Undecanoic acid       | C 11:0               | Und   | 4.90     | C <sub>11</sub> H <sub>22</sub> O <sub>2</sub> | 186.1620          | y = 29292x - 902.72          | 0.9840         | 7.81-1000            | 62.5        | 5           |
| 3    | Dodecanoic acid       | C 12:0               | Lau   | 5.54     | C <sub>12</sub> H <sub>24</sub> O <sub>2</sub> | 200.1776          | y = 33715x + 356.89          | 0.9997         | 15.6-250             | 15.6        | 2           |
| 4    | Tetradecenoic acid    | C 14:1 n-5           | Myr   | 5.84     | C <sub>14</sub> H <sub>26</sub> O <sub>2</sub> | 226.1933          | y = 100000x + 0.01           | 0.9954         | 1.95-500             | 1.95        | 2           |
| 5    | Tridecanoic acid      | C 13:0               | Trd   | 6.17     | C <sub>13</sub> H <sub>26</sub> O <sub>2</sub> | 214.1933          | y = 100000x + 0.02           | 0.9926         | 1.95-1000            | 1.95        | 2           |
| 6    | Pentadecenoic acid    | C 15:1 n-5           | Ped   | 6.43     | C <sub>15</sub> H <sub>28</sub> O <sub>2</sub> | 240.2089          | y = 129092x - 2018.1         | 0.9939         | 1.95-1000            | 1.95        | 1.8         |
| 7    | Eicosapentaenoic acid | C 20:5 n-3           | EPA   | 6.51     | C <sub>20</sub> H <sub>30</sub> O <sub>2</sub> | 302.2246          | y = 663622x + 27.50          | 0.9995         | 0.98-15.63           | 0.98        | 0.2         |
| 8    | Linolenic acid        | C 18:3 n-3           | Ln    | 6.60     | C <sub>18</sub> H <sub>30</sub> O <sub>2</sub> | 278.2246          | y = 159418x - 5154.8         | 0.9989         | 62.5-2000            | 62.5        | 0.4         |
| 9    | γ-Linoenic acid       | C 18:3 n-6           | γ- Ln | 6.70     | C <sub>18</sub> H <sub>30</sub> O <sub>2</sub> | 278.2246          | y = 1000000x - 2266.1        | 0.9991         | 1.95-1000            | 1.95        | 0.2         |
| 10   | Myristic acid         | C 14:0               | M     | 6.78     | C <sub>14</sub> H <sub>28</sub> O <sub>2</sub> | 228.2089          | y = 87468x + 1425.8          | 0.9966         | 15.6-250             | 15.6        | 2.0         |
| 11   | Docosahexaenoic acid  | C 22:6 n-3           | DHA   | 6.97     | C <sub>22</sub> H <sub>32</sub> O <sub>2</sub> | 328.2402          | y = 1000000x - 7144.4        | 0.9968         | 0.49-1000            | 0.49        | 0.3         |
| 12   | Hexadecenoic acid     | C 16:1 n-7           | Po    | 6.98     | C <sub>16</sub> H <sub>30</sub> O <sub>2</sub> | 254.2246          | y = 188317x - 110.78         | 0.9982         | 3.91-62.5            | 3.91        | 1.0         |
| 13   | Arachidonic acid      | C 20:4 n-6           | ARA   | 7.14     | C <sub>20</sub> H <sub>32</sub> O <sub>2</sub> | 304.2402          | y = 856304x + 80.07          | 0.9993         | 0.49-7.81            | 0.49        | 0.2         |
| 14   | Linoleic acid         | C 18:2 n-6           | L     | 7.28     | C <sub>18</sub> H <sub>32</sub> O <sub>2</sub> | 280.2402          | y = 369343x + 648.4          | 0.9995         | 31.25-1000           | 31.25       | 3.2         |
| 15   | Docosapentaenoic acid | C 22:5 n-6           | DPA   | 7.32     | C <sub>22</sub> H <sub>34</sub> O <sub>2</sub> | 329.2472          | y = 756179x + 93.56          | 0.9986         | 0.49-7.81            | 0.49        | 0.2         |
| 16   | Pentadecanoic acid    | C 15:0               | Pa    | 7.34     | C <sub>15</sub> H <sub>30</sub> O <sub>2</sub> | 242.2246          | y = 118427x + 917.11         | 0.9976         | 7.81-125             | 7.81        | 1.8         |
| 17   | Margaroleic acid      | C 17:1 n-8           | Mo    | 7.49     | C <sub>17</sub> H <sub>32</sub> O <sub>2</sub> | 268.2402          | y = 250469x - 108.38         | 0.9998         | 1.95-31.25           | 1.95        | 0.4         |
| 18   | Leinoleic acid        | C 18:2 t n-6         | t-L   | 7.51     | C <sub>18</sub> H <sub>32</sub> O <sub>2</sub> | 280.2402          | y = 245453x + 181.3          | 0.9970         | 7.81-125             | 7.81        | 1.2         |
| 19   | Docosapentaenoic acid | C 22:5 n-3           | Dop   | 7.57     | C <sub>22</sub> H <sub>34</sub> O <sub>2</sub> | 330.2559          | y = 1000000x - 4072.3        | 0.9990         | 0.98-1000            | 0.98        | 0.1         |
| 20   | Eicosatrienoic acid   | C 20:3 n-6           | E     | 7.59     | C <sub>20</sub> H <sub>34</sub> O <sub>2</sub> | 306.2559          | y = 975766x - 267.34         | 0.9992         | 0.98-31.25           | 0.98        | 0.1         |

**Table 2 Continued**

| Peak | Component name        | CN/DB <sup>(2)</sup> | Abbr. | RT (min) | Formula                                        | Neutral mass (Da) | Regression equation<br>(y=ax+b) | R <sup>2</sup> | Linear range<br>(ng/mL) | LOQ<br>(ng/mL) | LOD<br>(ng/mL) |
|------|-----------------------|----------------------|-------|----------|------------------------------------------------|-------------------|---------------------------------|----------------|-------------------------|----------------|----------------|
| 21   | Docosatetraenoic acid | C 22:4 n-6           | Dos   | 7.85     | C <sub>22</sub> H <sub>36</sub> O <sub>2</sub> | 332.2715          | y = 1000000x - 7640.8           | 0.9982         | 1.95-1000               | 1.95           | 0.1            |
| 22   | Palmitic acid         | C 16:0               | P     | 7.89     | C <sub>16</sub> H <sub>32</sub> O <sub>2</sub> | 256.2402          | y = 183222x + 44180             | 0.9999         | 31.25-2000              | 31.25          | 0.5            |
| 23   | Oleic acid            | C 18:1 n-9           | O     | 7.99     | C <sub>18</sub> H <sub>34</sub> O <sub>2</sub> | 282.2559          | y = 738540x + 8249.5            | 0.9994         | 15.63-1000              | 15.63          | 0.5            |
| 24   | Elaidic acid          | C 18:1 t n-9         | t-O   | 8.12     | C <sub>18</sub> H <sub>34</sub> O <sub>2</sub> | 282.2559          | y = 372100x - 2464.7            | 0.9987         | 15.63-1000              | 15.63          | 0.5            |
| 25   | Eicosadienoic acid    | C 20:2 n-9           | Ed    | 8.17     | C <sub>20</sub> H <sub>36</sub> O <sub>2</sub> | 308.2715          | y = 542127x - 79.67             | 0.9986         | 0.98-31.25              | 0.98           | 0.2            |
| 26   | Margaric acid         | C 17:0               | M     | 8.31     | C <sub>17</sub> H <sub>34</sub> O <sub>2</sub> | 270.2559          | y = 576564x + 971.67            | 0.9991         | 1.95-62.50              | 1.95           | 0.2            |
| 27   | Stearic acid          | C 18:0               | S     | 8.73     | C <sub>18</sub> H <sub>36</sub> O <sub>2</sub> | 284.2715          | y = 301696x + 87866             | 0.9976         | 125-2000                | 125            | 0.4            |
| 28   | Gadoleic acid         | C 20:1 n-9           | God   | 8.78     | C <sub>20</sub> H <sub>38</sub> O <sub>2</sub> | 310.2872          | y = 657130x - 213.97            | 0.9993         | 3.91-62.50              | 3.91           | 0.2            |
| 29   | Docosadienoic acid    | C 22:2 n-9           | Dad   | 8.92     | C <sub>22</sub> H <sub>40</sub> O <sub>2</sub> | 336.3028          | y = 736100x + 192.14            | 0.9999         | 0.49-7.81               | 0.49           | 0.2            |
| 30   | Arachidic acid        | C 20:0               | Ara   | 9.42     | C <sub>20</sub> H <sub>40</sub> O <sub>2</sub> | 312.3028          | y = 621653x + 1941.9            | 0.9999         | 15.62-250               | 15.62          | 1.8            |
| 31   | Erucic acid           | C 22:1 n-9           | Eru   | 9.44     | C <sub>22</sub> H <sub>42</sub> O <sub>2</sub> | 338.3185          | y = 786416x + 741.43            | 0.9991         | 0.98-15.63              | 0.98           | 0.2            |
| 32   | Heneicosanoic acid    | C 21:0               | Hen   | 9.72     | C <sub>21</sub> H <sub>42</sub> O <sub>2</sub> | 326.3185          | y = 711092x + 156.04            | 0.9995         | 1.95-31.25              | 1.95           | 1.2            |
| 33   | Nervonic acid         | C 24:1 n-9           | Ner   | 9.99     | C <sub>24</sub> H <sub>46</sub> O <sub>2</sub> | 366.3498          | y = 895577x + 434.55            | 0.9991         | 0.49-15.63              | 0.49           | 0.2            |
| 34   | Behenic acid          | C 22:0               | Beh   | 10.00    | C <sub>22</sub> H <sub>44</sub> O <sub>2</sub> | 340.3341          | y = 842438x + 793.18            | 0.9977         | 3.91-250                | 1.95           | 0.4            |
| 35   | Tricosanoic acid      | C 23:0               | Trc   | 10.25    | C <sub>23</sub> H <sub>46</sub> O <sub>2</sub> | 354.3498          | y = 1000000x + 2372.7           | 0.9999         | 1.95-125                | 1.95           | 0.4            |
| 36   | Lignoceric acid       | C 24:0               | Lig   | 10.49    | C <sub>24</sub> H <sub>48</sub> O <sub>2</sub> | 368.3854          | y = 1000000x + 16719            | 0.9963         | 3.91-500                | 1.95           | 0.4            |

Cite: CN/DB:CN: carbon number DB: double bonds.
